# Supplementary material for: Supported Cu3 clusters on graphitic carbon nitride as an efficient catalyst for CO electroreduction to propene
Source: Royal Society of Chemistry journal article supplement (doi:10.1039/d2ta02463b), 2022-01-01
Supplement: d2ta02463b1.pdf [file d2ta02463b1.pdf]

**Electronic Supporting Information (ESI)**

**Supported Cu<sub>3</sub> Cluster on Graphitic Carbon Nitride as an Efficient Catalyst for  
CO Electroreduction to Propene**

Yuting Sun,<sup>a</sup> Shuang Wang,<sup>a</sup> Jingjing Jia,<sup>a</sup> Yuejie Liu,<sup>b,\*</sup> Qinghai Cai,<sup>a,c</sup> Jingxiang  
Zhao<sup>a,\*</sup>

<sup>a</sup> *College of Chemistry and Chemical Engineering, Key Laboratory of Photonic and  
Electronic Bandgap Materials, Ministry of Education, Harbin Normal University,  
Harbin 150025, Heilongjiang, China*

<sup>b</sup> *Modern Experiment Center, Harbin Normal University, Harbin, 150025, China*

<sup>c</sup> *Heilongjiang Province Collaborative Innovation Center of Cold Region Ecological  
Safety, Harbin 150025, China*

\* To whom correspondence should be addressed. Email: zjx1103@hotmail.com (YL) ;

xjz\_hmily@163.com or zhaojingxiang@hrbnu.edu.cn (JZ)

## Computational Details of Dissolution Potential

To evaluate the stability of Cu<sub>3</sub>@g-C<sub>3</sub>N<sub>4</sub> monolayer in strong acidic media, we computed the dissolution potentials ( $U_{\text{diss}}$ , in V) of Cu in Cu<sub>3</sub>@g-C<sub>3</sub>N<sub>4</sub> at pH = 0, which was defined as:  $U_{\text{diss}} = U_{\text{Cu}}^0 + [E_{\text{Cu,bulk}} - (E_{\text{Cu}_3\text{@g-C}_3\text{N}_4} - E_{\text{d-Cu}_3\text{@g-C}_3\text{N}_4})]/ne$ , where  $U_{\text{Cu}}^0$  is the standard dissolution potential of Cu in the bulk form, d-Cu<sub>3</sub>@g-C<sub>3</sub>N<sub>4</sub> is the defective Cu<sub>3</sub>@g-C<sub>3</sub>N<sub>4</sub> monolayer by dissolving (removing) one Cu to solutions and  $n$  is the coefficient for the aqueous dissolution reaction:  $\text{Cu} + 2\text{H}^+ \leftrightarrow \text{Cu}^{2+} + \text{H}_2$ , namely,  $n$  equals to 2.

**Table S1.** The computed binding energies ( $E_{\text{bind}}$ ), shortest distances between Cu clusters and g-C<sub>3</sub>N<sub>4</sub>, and the charges ( $Q$ ) for various Cu<sub>n</sub> (n=1-6) clusters anchored on g-C<sub>3</sub>N<sub>4</sub>.

|                                                  | $Q( e )$        |                 |                 |                 |                 |                 | total | $d_{\text{Cu-N}}$<br>(Å) | $E_{\text{bind}}$<br>(eV) |
|--------------------------------------------------|-----------------|-----------------|-----------------|-----------------|-----------------|-----------------|-------|--------------------------|---------------------------|
|                                                  | Cu <sub>1</sub> | Cu <sub>2</sub> | Cu <sub>3</sub> | Cu <sub>4</sub> | Cu <sub>5</sub> | Cu <sub>6</sub> |       |                          |                           |
| Cu <sub>1</sub> @g-C <sub>3</sub> N <sub>4</sub> | 0.74            | —               | —               | —               | —               | —               | 0.74  | 2.18                     | -4.55                     |
| Cu <sub>2</sub> @g-C <sub>3</sub> N <sub>4</sub> | 0.41            | 0.44            | —               | —               | —               | —               | 0.85  | 1.95                     | -4.01                     |
| Cu <sub>3</sub> @g-C <sub>3</sub> N <sub>4</sub> | 0.31            | 0.31            | 0.31            | —               | —               | —               | 0.94  | 2.03                     | -6.16                     |
| Cu <sub>4</sub> @g-C <sub>3</sub> N <sub>4</sub> | 0.40            | 0.42            | 0.41            | -0.03           | —               | —               | 1.20  | 2.00                     | -7.86                     |
| Cu <sub>5</sub> @g-C <sub>3</sub> N <sub>4</sub> | 0.36            | 0.41            | 0.43            | -0.10           | 0.02            | —               | 1.12  | 2.00                     | -6.62                     |
| Cu <sub>6</sub> @g-C <sub>3</sub> N <sub>4</sub> | 0.41            | 0.41            | 0.42            | -0.04           | -0.03           | -0.05           | 0.65  | 2.01                     | -6.28                     |

**Table S2.** The computed free energy changes ( $\Delta G$ , eV) of each possible elementary step for COER to generate  $\text{CH}_4$  product on  $\text{Cu}_3@g\text{-C}_3\text{N}_4$ . The red represents higher selectivity.

| Elementary step                                                                                  | Free energy change ( $\Delta G$ ) |
|--------------------------------------------------------------------------------------------------|-----------------------------------|
| $\text{CO (g)} + * \rightarrow \text{CO}^*$                                                      | -0.98                             |
| $\text{CO}^* + \text{H}^+ + \text{e}^- \rightarrow \text{CHO}^*$                                 | 0.45                              |
| $\text{CO}^* + \text{H}^+ + \text{e}^- \rightarrow \text{COH}^*$                                 | 1.12                              |
| $\text{CHO}^* + \text{H}^+ + \text{e}^- \rightarrow \text{CH}_2\text{O}^*$                       | 0.03                              |
| $\text{CHO}^* + \text{H}^+ + \text{e}^- \rightarrow \text{CHOH}^*$                               | 0.45                              |
| $\text{CH}_2\text{O}^* + \text{H}^+ + \text{e}^- \rightarrow \text{CH}_3\text{O}^*$              | -0.63                             |
| $\text{CH}_2\text{O}^* + \text{H}^+ + \text{e}^- \rightarrow \text{CH}_2\text{OH}^*$             | -0.55                             |
| $\text{CH}_3\text{O}^* + \text{H}^+ + \text{e}^- \rightarrow \text{O}^* + \text{CH}_4(\text{g})$ | -0.81                             |
| $\text{CH}_3\text{O}^* + \text{H}^+ + \text{e}^- \rightarrow \text{CH}_3\text{OH}^*$             | 0.76                              |
| $\text{O}^* + \text{H}^+ + \text{e}^- \rightarrow \text{OH}^*$                                   | -0.33                             |
| $\text{OH}^* + \text{H}^+ + \text{e}^- \rightarrow * + \text{H}_2\text{O}$                       | 0.37                              |

**Table S3.** The computed free energy changes ( $\Delta G$ , eV) of each possible elementary step for COER to generate  $C_3$  product on  $Cu_3@g-C_3N_4$ . The red represents higher selectivity.

| Elementary step                                          | Free energy change ( $\Delta G$ ) |
|----------------------------------------------------------|-----------------------------------|
| $3CO(g) + * \rightarrow CO-CO-CO^*$                      | -0.81                             |
| $CO-CO-CO^* + H^+ + e^- \rightarrow CO-COH-CO^*$         | -0.55                             |
| $CO-CO-CO^* + H^+ + e^- \rightarrow CO-HCO-CO^*$         | 0.18                              |
| $CO-COH-CO^* + H^+ + e^- \rightarrow CO-C-CO^* + H_2O$   | -0.14                             |
| $CO-COH-CO^* + H^+ + e^- \rightarrow COH-COH-CO^*$       | 0.03                              |
| $CO-COH-CO^* + H^+ + e^- \rightarrow CHO-COH-CO^*$       | 0.31                              |
| $CO-COH-CO^* + H^+ + e^- \rightarrow CO-HCOH-CO^*$       | 0.60                              |
| $CO-COH-CO^* + H^+ + e^- \rightarrow CO-COH-COH^*$       | 0.05                              |
| $CO-COH-CO^* + H^+ + e^- \rightarrow CO-COH-CHO^*$       | 0.33                              |
| $CO-C-CO^* + H^+ + e^- \rightarrow CH-CO-CO^*$           | -0.52                             |
| $CO-C-CO^* + H^+ + e^- \rightarrow CHO-C-CO^*$           | -0.44                             |
| $CO-C-CO^* + H^+ + e^- \rightarrow COH-C-CO^*$           | 0.25                              |
| $CO-C-CO^* + H^+ + e^- \rightarrow CO-C-COH^*$           | 0.12                              |
| $CO-C-CO^* + H^+ + e^- \rightarrow CO-C-CHO^*$           | -0.31                             |
| $CH-CO-CO^* + H^+ + e^- \rightarrow CH-COH-CO^*$         | -0.18                             |
| $CH-CO-CO^* + H^+ + e^- \rightarrow CH_2-CO-CO^*$        | 0.02                              |
| $CH-CO-CO^* + H^+ + e^- \rightarrow CH-CHO-CO^*$         | 0.07                              |
| $CH-CO-CO^* + H^+ + e^- \rightarrow CH-CO-CHO^*$         | 0.27                              |
| $CH-CO-CO^* + H^+ + e^- \rightarrow CH-CO-COH^*$         | 0.18                              |
| $CH-COH-CO^* + H^+ + e^- \rightarrow CH-COH-CHO^*$       | -0.20                             |
| $CH-COH-CO^* + H^+ + e^- \rightarrow CH_2-COH-CO^*$      | -0.06                             |
| $CH-COH-CO^* + H^+ + e^- \rightarrow CH-C-CO^* + H_2O$   | 0.25                              |
| $CH-COH-CO^* + H^+ + e^- \rightarrow CH-HCOH-CO^*$       | 0.77                              |
| $CH-COH-CO^* + H^+ + e^- \rightarrow CH-COH-COH^*$       | -0.02                             |
| $CH-COH-CHO^* + H^+ + e^- \rightarrow CH-C-CHO^* + H_2O$ | -0.10                             |
| $CH-COH-CHO^* + H^+ + e^- \rightarrow CH_2-COH-CHO^*$    | 0.50                              |
| $CH-COH-CHO^* + H^+ + e^- \rightarrow CH-HCOH-CHO^*$     | 1.11                              |
| $CH-COH-CHO^* + H^+ + e^- \rightarrow CH-COH-CHOH^*$     | 0.44                              |
| $CH-COH-CHO^* + H^+ + e^- \rightarrow CH-COH-CH_2O^*$    | 1.15                              |
| $CH-C-CHO^* + H^+ + e^- \rightarrow CH_2-C-CHO^*$        | -0.12                             |

|                                                                                                                    |       |
|--------------------------------------------------------------------------------------------------------------------|-------|
| $\text{CH-C-CHO}^* + \text{H}^+ + \text{e}^- \rightarrow \text{CH-CH-CHO}^*$                                       | 0.09  |
| $\text{CH-C-CHO}^* + \text{H}^+ + \text{e}^- \rightarrow \text{CH-C-CHOH}^*$                                       | 0.11  |
| $\text{CH-C-CHO}^* + \text{H}^+ + \text{e}^- \rightarrow \text{CH-C-CH}_2\text{O}^*$                               | 1.12  |
| $\text{CH}_2\text{-C-CHO}^* + \text{H}^+ + \text{e}^- \rightarrow \text{CH}_3\text{-C-CHO}^*$                      | -0.34 |
| $\text{CH}_2\text{-C-CHO}^* + \text{H}^+ + \text{e}^- \rightarrow \text{CH}_2\text{-CH-CHO}^*$                     | -0.15 |
| $\text{CH}_2\text{-C-CHO}^* + \text{H}^+ + \text{e}^- \rightarrow \text{CH}_2\text{-C-CHOH}^*$                     | 0.06  |
| $\text{CH}_2\text{-C-CHO}^* + \text{H}^+ + \text{e}^- \rightarrow \text{CH}_2\text{-C-CH}_2\text{O}^*$             | -0.09 |
| $\text{CH}_3\text{-C-CHO}^* + \text{H}^+ + \text{e}^- \rightarrow \text{CH}_3\text{-C-CHOH}^*$                     | -0.09 |
| $\text{CH}_3\text{-C-CHO}^* + \text{H}^+ + \text{e}^- \rightarrow \text{CH}_3\text{-CH-CHO}^*$                     | 0.17  |
| $\text{CH}_3\text{-C-CHO}^* + \text{H}^+ + \text{e}^- \rightarrow \text{CH}_3\text{-C-CH}_2\text{O}^*$             | 0.61  |
| $\text{CH}_3\text{-C-CHOH}^* + \text{H}^+ + \text{e}^- \rightarrow \text{CH}_3\text{-C-CH}^* + \text{H}_2\text{O}$ | -0.66 |
| $\text{CH}_3\text{-C-CHOH}^* + \text{H}^+ + \text{e}^- \rightarrow \text{CH}_3\text{-CH-CHOH}^*$                   | 0.25  |
| $\text{CH}_3\text{-C-CHOH}^* + \text{H}^+ + \text{e}^- \rightarrow \text{CH}_3\text{-C-CH}_2\text{OH}^*$           | 0.42  |
| $\text{CH}_3\text{-C-CH}^* + \text{H}^+ + \text{e}^- \rightarrow \text{CH}_3\text{-CH-CH}^*$                       | -0.51 |
| $\text{CH}_3\text{-C-CH}^* + \text{H}^+ + \text{e}^- \rightarrow \text{CH}_3\text{-C-CH}_2^*$                      | -0.36 |
| $\text{CH}_3\text{-CH-CH}^* + \text{H}^+ + \text{e}^- \rightarrow \text{CH}_3\text{-CH-CH}_2^*$                    | 0.40  |
| $\text{CH}_3\text{-CH-CH}^* + \text{H}^+ + \text{e}^- \rightarrow \text{CH}_3\text{-CH}_2\text{-CH}^*$             | 0.51  |
| $\text{CH}_3\text{-CH-CH}_2^* \rightarrow \text{CH}_3\text{-CH-CH}_2 + ^*$                                         | 0.48  |

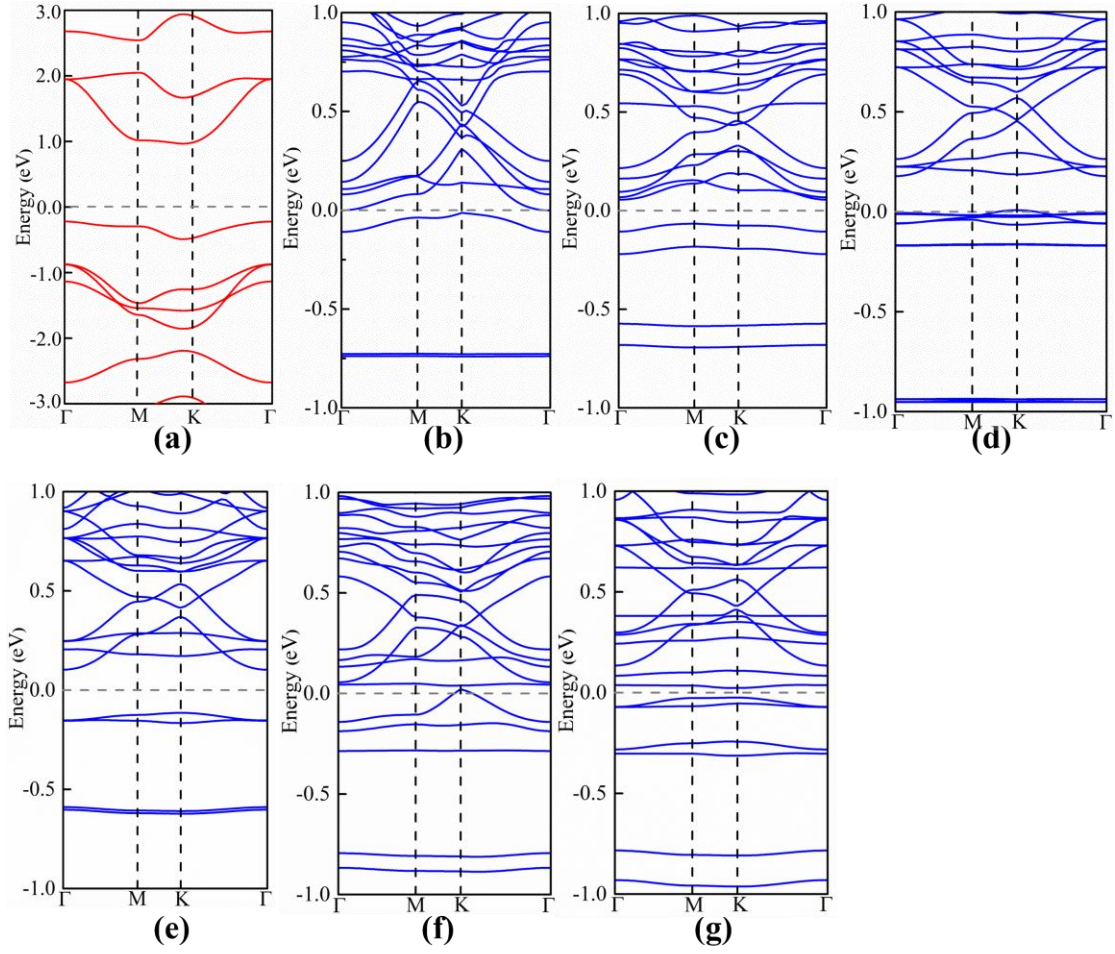

**Fig. S1.** The computed band structure for (a) the pristine  $g\text{-C}_3\text{N}_4$ , (b)  $\text{Cu}_1@g\text{-C}_3\text{N}_4$ , (c)  $\text{Cu}_2@g\text{-C}_3\text{N}_4$ , (d)  $\text{Cu}_3@g\text{-C}_3\text{N}_4$ , (e)  $\text{Cu}_4@g\text{-C}_3\text{N}_4$ , (f)  $\text{Cu}_5@g\text{-C}_3\text{N}_4$  and (g)  $\text{Cu}_6@g\text{-C}_3\text{N}_4$ . The Fermi level was set to zero in dotted line.

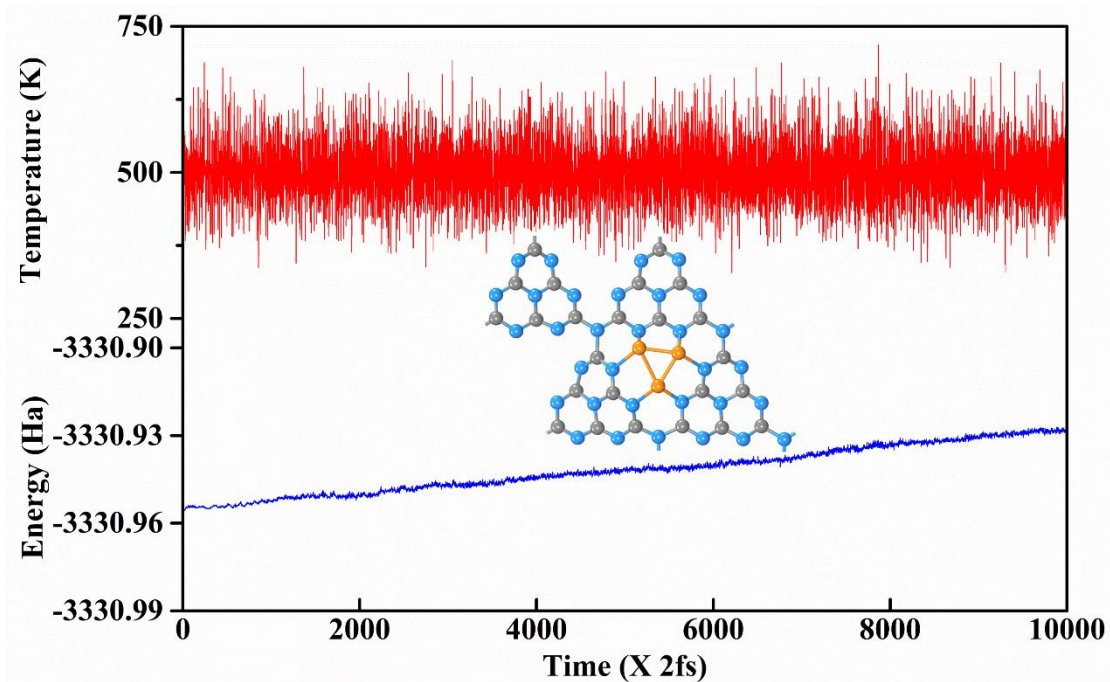

**Fig. S2.** Variations of temperature and energy as a function of the time for AIMD simulations of  $\text{Cu}_3@\text{g-C}_3\text{N}_4$ ; insert is top view of the snapshot of atomic configuration. The simulation is run under 500 K for 20 ps with a time step of 2 fs. Gray, blue and orange spheres represent the C, N and Cu atoms, respectively.



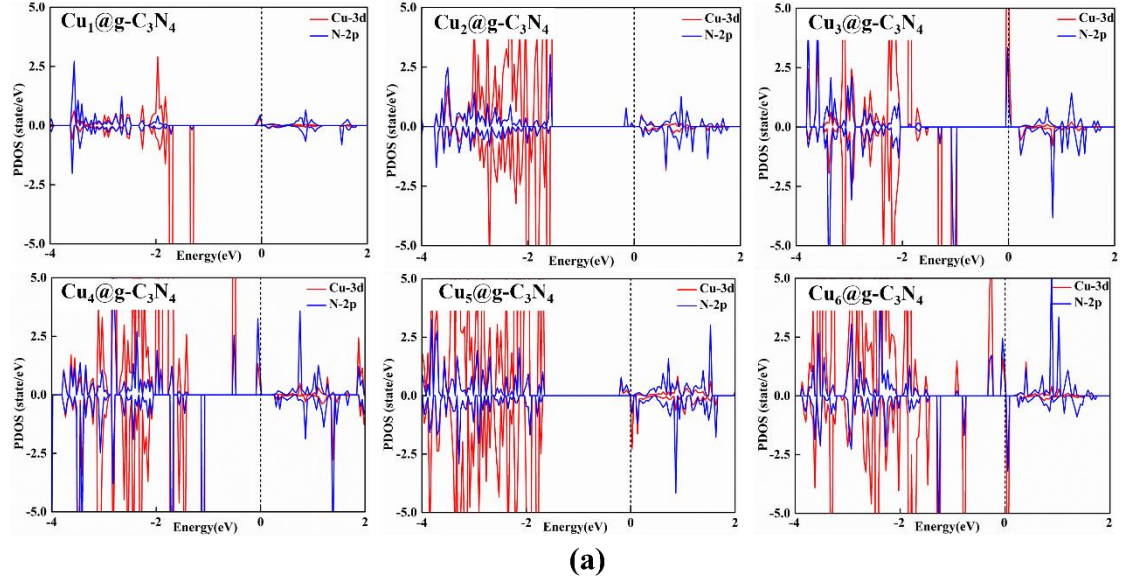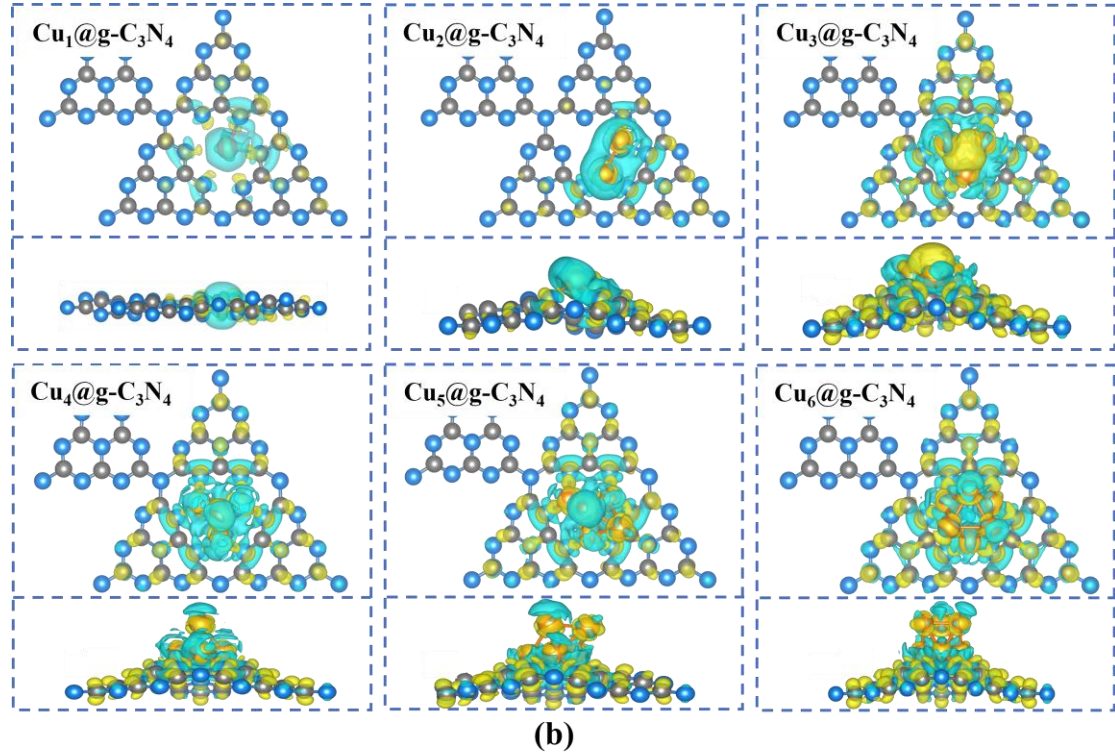

**Fig. S3.** (a) The projected density of states (PDOSs) between Cu-3d and N-2p orbitals for  $\text{Cu}_n@g\text{-C}_3\text{N}_4$  ( $n = 1\sim 6$ ) monolayer, and the Fermi level was set to zero in dotted line. (b) Charge density differences of  $\text{Cu}_n@g\text{-C}_3\text{N}_4$  ( $n = 1\sim 6$ ). The cyan and yellow regions refer to electron depletion regions and accumulation. The isosurface values were set as  $0.003 \text{ eV } \text{\AA}^{-3}$ .

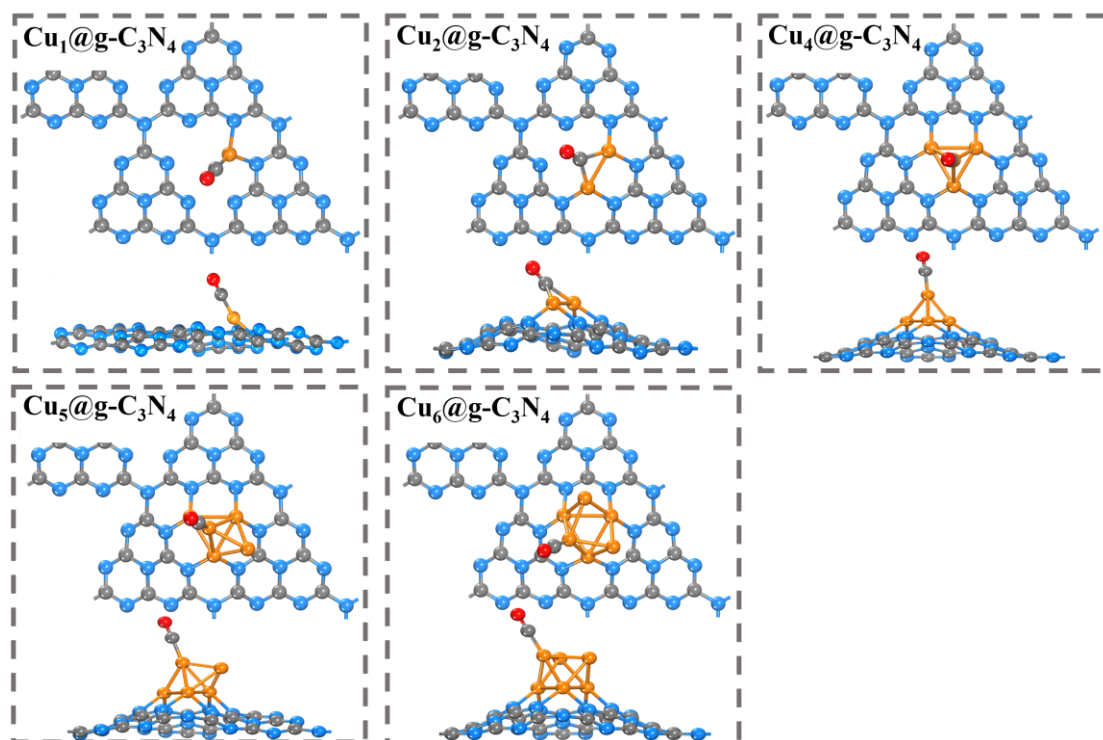

**Fig. S4.** The optimized most stable configurations for the adsorption of CO molecule on  $\text{Cu}_n\text{@g-C}_3\text{N}_4$  ( $n = 1-2$  and  $4-6$ ). The gray, blue, orange and red balls represent C, N, Cu and O atoms, respectively.

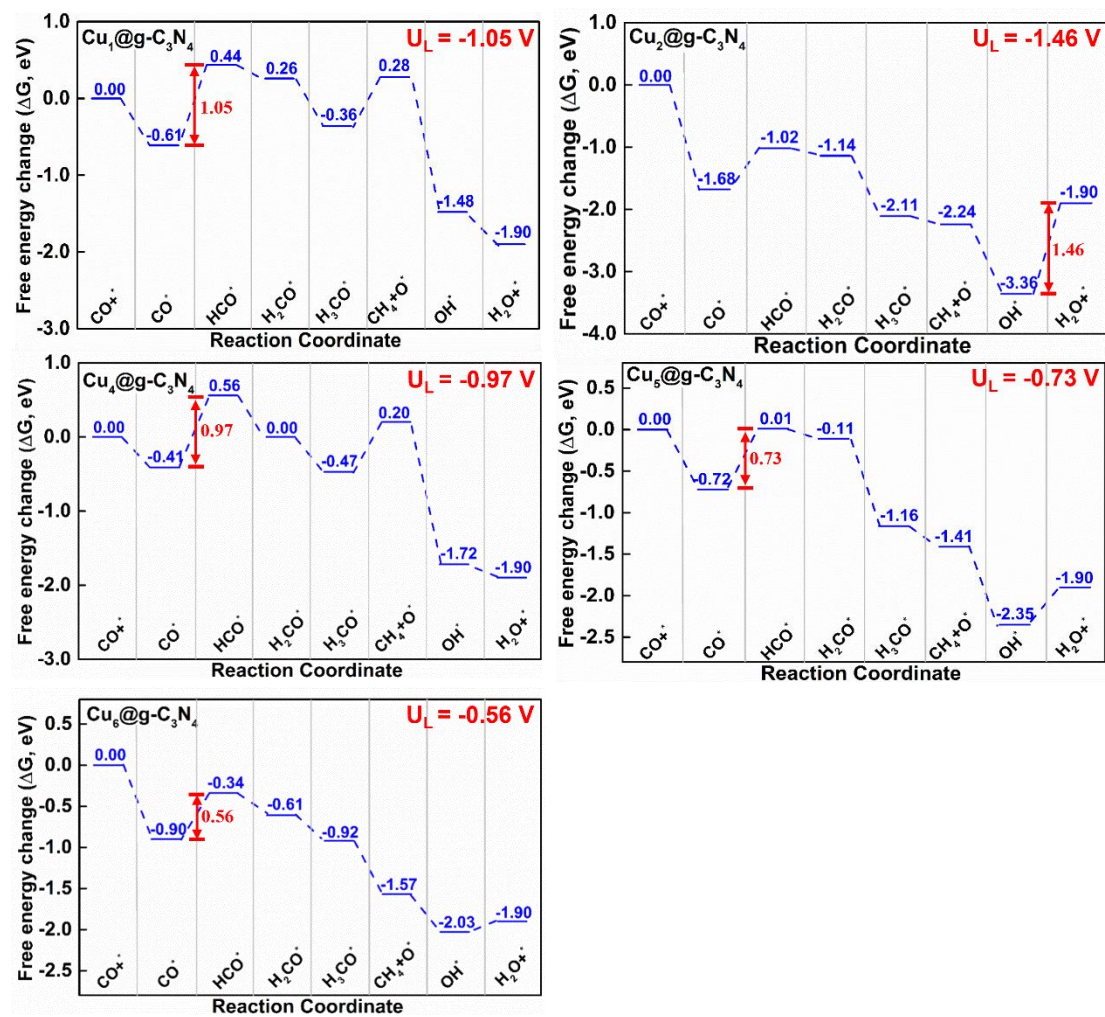

**Fig. S5.** Free energy diagrams for COER on  $\text{Cu}_n@g\text{-C}_3\text{N}_4$  (n = 1-2 and 4-6).

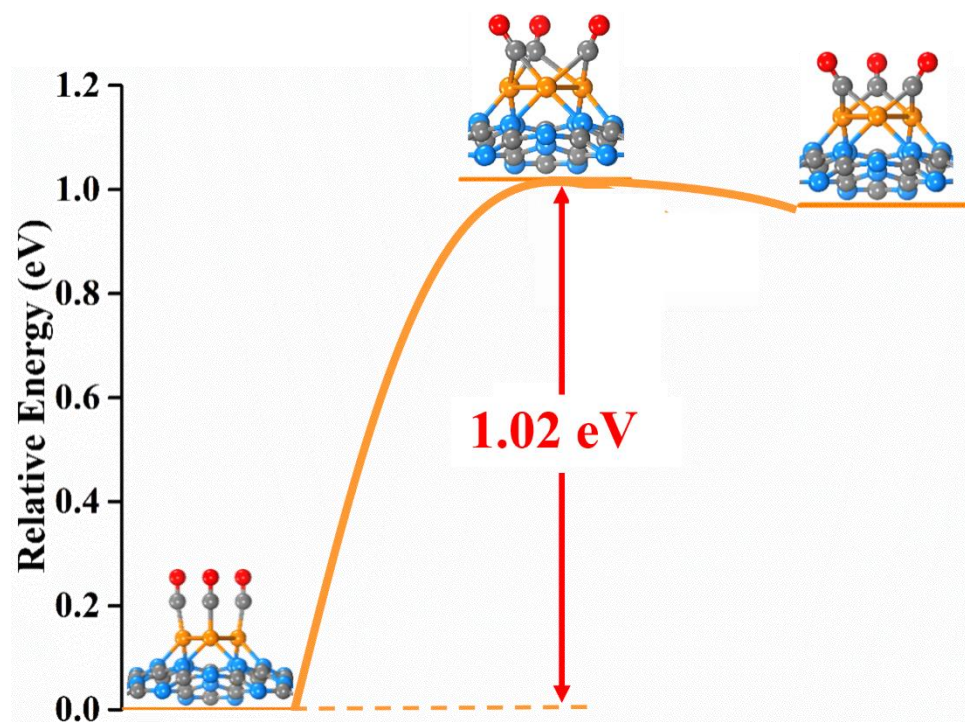

**Fig. S6.** The minimum pathway and the corresponding atomic configurations for the transformation from  $\alpha$ -3CO\* to  $\beta$ -3CO\*.

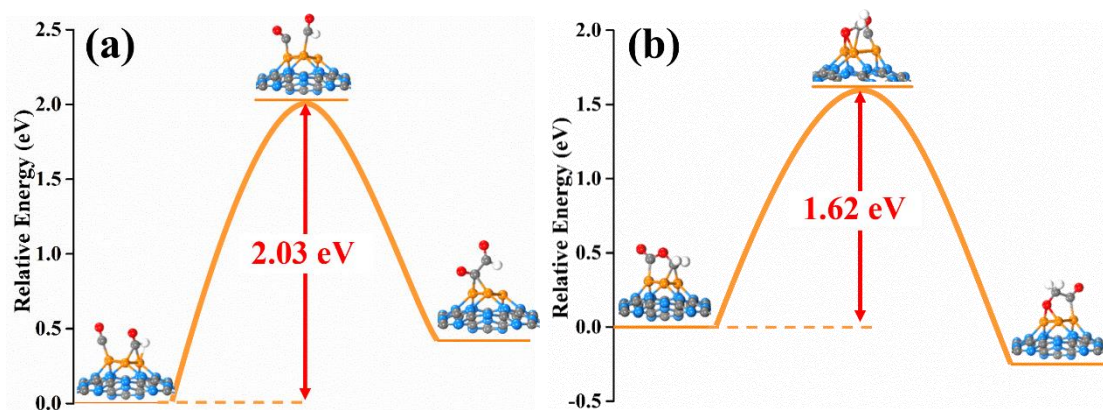

**Fig. S7.** The computed minimum pathways and the involved atomic configurations for (a) the coupling between  $\text{CO}^*$  and  $\text{CHO}^*$  and (b) the coupling between  $\text{CO}^*$  and  $\text{CH}_2\text{O}^*$ . The gray, blue, orange, red, and white balls represent C, N, Cu, O and H atoms, respectively.

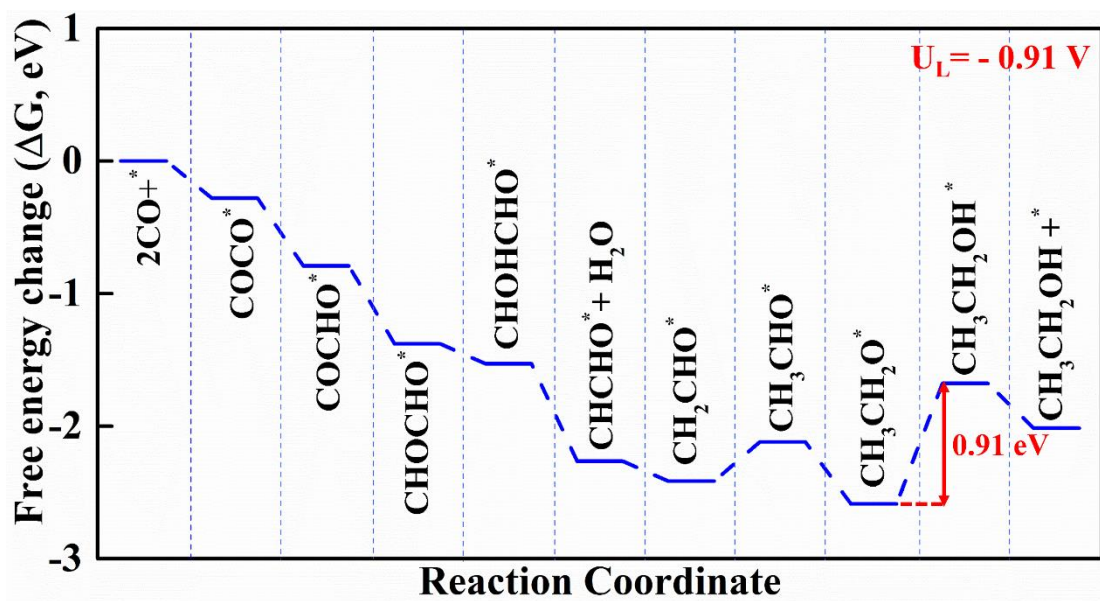

**Fig. S8.** The most energetically favorable reaction pathway for COER to generate  $C_2$  products (ethanol) on  $Cu_3@g-C_3N_4$ .
